# Supplementary material for: Enriched environment improves working memory impairment of mice with traumatic brain injury by enhancing histone acetylation in the prefrontal cortex
Source: PeerJ. 2018 Dec 7;6:e6113. doi: 10.7717/peerj.6113 (PMC6287579; doi:10.7717/peerj.6113)
Supplement: Table S2 — Six left prefrontal cortex of mice per group were used to detect cholinergic system’s function. The TBI+SE group mice showed significantly decreased Ach levels in their left prefrontal cortex compared to those of the SHAM+SE group mice (p < 0.01). After living in EE for 4 weeks, the Ach levels of the TBI+EE group mice had a remarkable growth compared with those of the TBI+SE group mice (p < 0.05). However, the TBI+EE group mice still exhibited lower Ach levels than those of the SHAM+SE group mice (p < 0.05). The changes of protein expression and mRNA levels of ChAT of mice in different groups were in accordance with the changes of Ach levels of mice in different groups. [file peerj-06-6113-s002.xlsx]

## Sheet: Sheet1
Ach level	（ug/ mg protein)
SHAM+SE	115	117	108	111	114	110
TBI+SE	56	57	62	59	57	61
TBI+EE	81	84	87	85	84	86
mRNA level of ChAT (ChAT/GAPDH)
SHAM+SE	1.3	1.2	1.1	1.1	0.9	1.1
TBI+SE	0.6	0.6	0.5	0.4	0.5	0.5
TBI+EE	0.7	0.8	0.8	0.8	0.9	0.7
protein expression of ChAT (ChAT/GAPDH)
SHAM+SE	0.7	0.7	0.8	0.7	0.8	0.8
TBI+SE	0.3	0.3	0.3	0.3	0.4	0.3
TBI+EE	0.5	0.4	0.6	0.5	0.6	0.5
