# Supplementary material for: Enriched environment improves working memory impairment of mice with traumatic brain injury by enhancing histone acetylation in the prefrontal cortex
Source: PeerJ. 2018 Dec 7;6:e6113. doi: 10.7717/peerj.6113 (PMC6287579; doi:10.7717/peerj.6113)
Supplement: Table S3 — The result of histone acetylation in the prefrontal cortex of contralateral side of TBI. The levels of protein expression of Ac-H3 and Ac-H4 were examined. The left prefrontal cortex’s Ac-H3 and Ac-H4 protein expression of the TBI+SE group mice had significant decrease in comparison with those of the SHAM+SE group mice (P < 0.01). After for 4 weeks living in EE, the left prefrontal cortex’s Ac-H3 protein expression of the TBI+EE group mice exhibited a significant rise in comparison with that of the TBI mice living in the standard environment (P < 0.05). But there had no changes of Ac-H4 protein expression of the TBI+EE group mice compared with that of the TBI+SE group mice (P > 0.05). The left prefrontal cortex’s Ac-H3 protein expression of the TBI+EE group mice was still obviously different from that of the sham-operated mice living in the standard environment (P < 0.05). [file peerj-06-6113-s003.xlsx]

## Sheet: Sheet1
Ac-H3 protein expression (Ac-H3/GAPDH)
SHAM+SE	1	1.1	1.3	1.1	1	1.2
TBI+SE	0.4	0.4	0.4	0.5	0.4	0.4
TBI+EE	0.7	0.8	0.8	0.7	0.7	0.8
Ac-H4 protein expression (Ac-H4 /GAPDH)
SHAM+SE	1	1	0.9	0.9	0.9	0.9
TBI+SE	0.4	0.5	0.4	0.4	0.4	0.4
TBI+EE	0.5	0.5	0.4	0.4	0.4	0.4
