# Supplementary material for: Enriched environment improves working memory impairment of mice with traumatic brain injury by enhancing histone acetylation in the prefrontal cortex
Source: PeerJ. 2018 Dec 7;6:e6113. doi: 10.7717/peerj.6113 (PMC6287579; doi:10.7717/peerj.6113)
Supplement: Table S4 — It was also observed the changes of protein expression of CBP in the prefrontal cortex of contralateral side of TBI between different groups. The expression levels of CBP in the TBI+SE group mice was decreased significantly compared with those of the SHAM+SE group mice (p < 0.01). The TBI+EE group mice showed significantly increased expression levels of CBP compared with the TBI+SE group mice (p < 0.05). But there was still a significant reduction in expression levels of CBP in the TBI+EE group mice in comparison with that of the SHAM+SE group mice (p < 0.05). [file peerj-06-6113-s004.xlsx]

## Sheet: Sheet1
CBP expression (CBP /GAPDH)
SHAM+SE	0.7	0.7	0.7	0.7	0.8	0.8
TBI+SE	0.3	0.3	0.3	0.3	0.2	0.3
TBI+EE	0.4	0.4	0.5	0.5	0.5	0.5
